# Supplementary material
Source: PubMed Central journal article supplement (PMC1472448)

**A**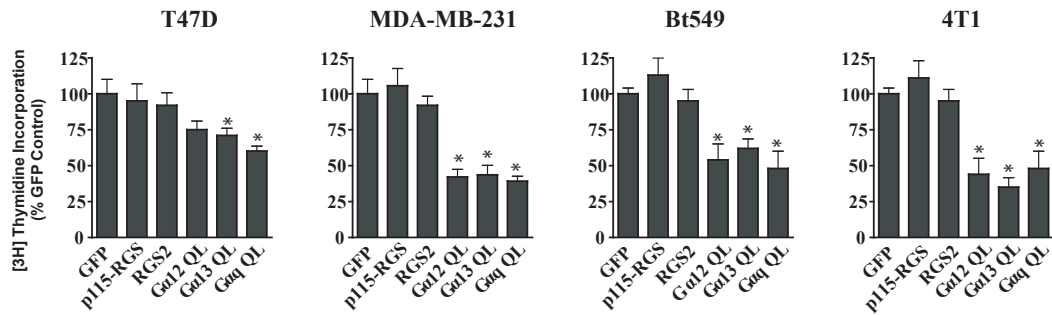**B**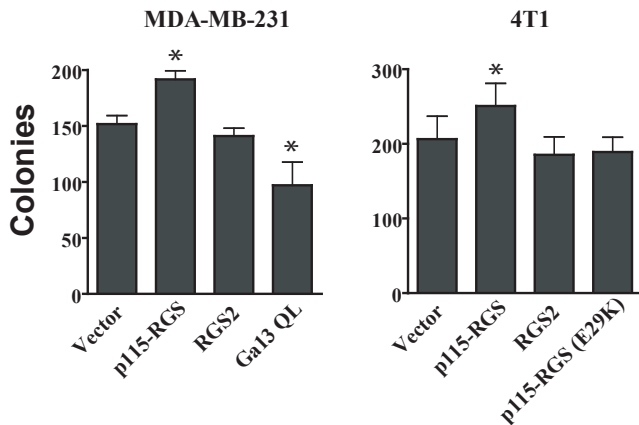

Supplement: pnas_0510254103_1.pdf [file pnas_0510254103_1.pdf]

**A**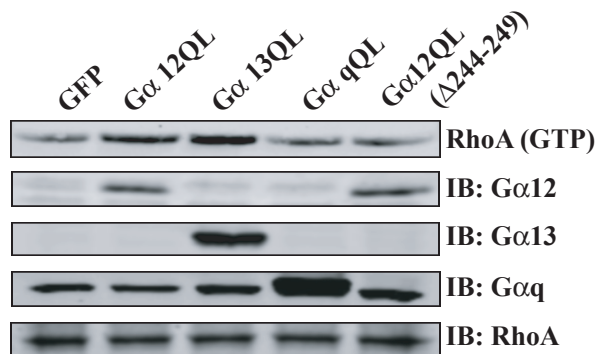**B**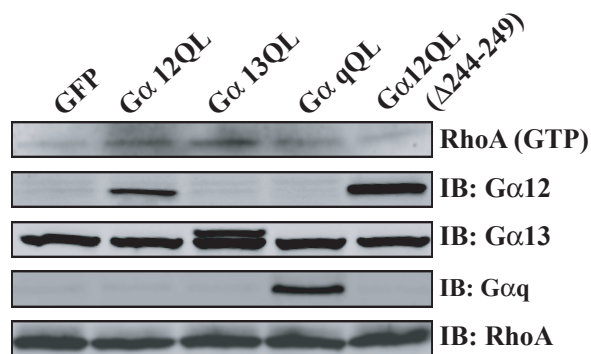**C**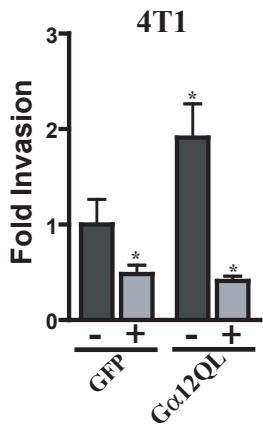**D**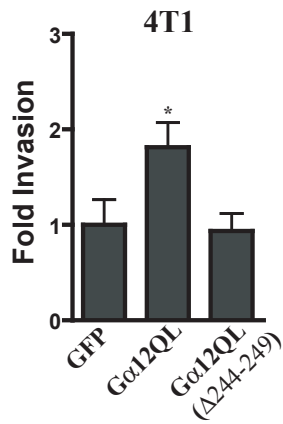

Supplement: pnas_0510254103_2.pdf [file pnas_0510254103_2.pdf]

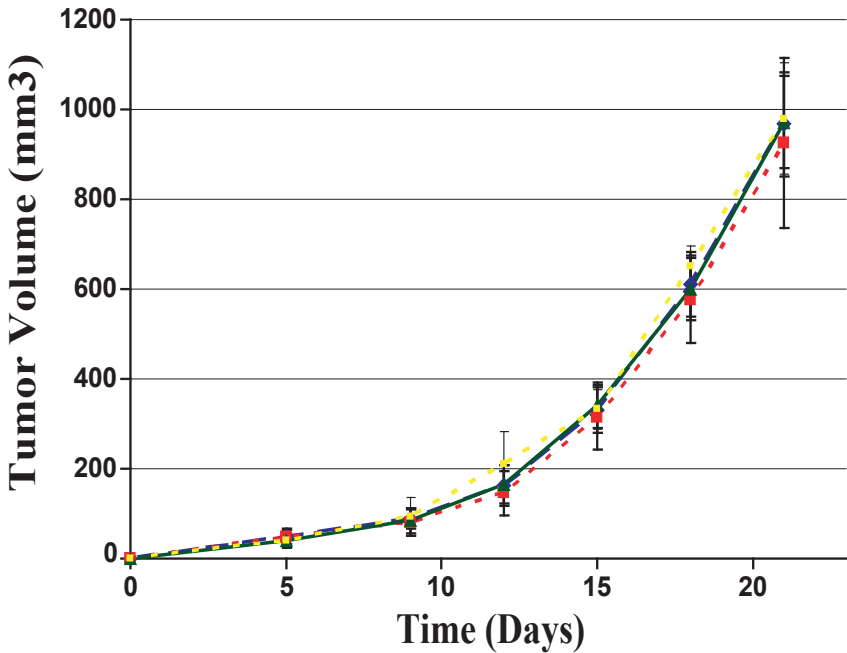

Supplement: pnas_0510254103_3.pdf [file pnas_0510254103_3.pdf]

**A**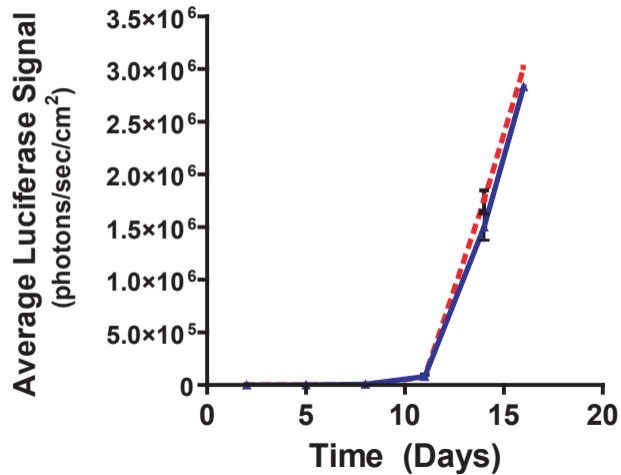**B**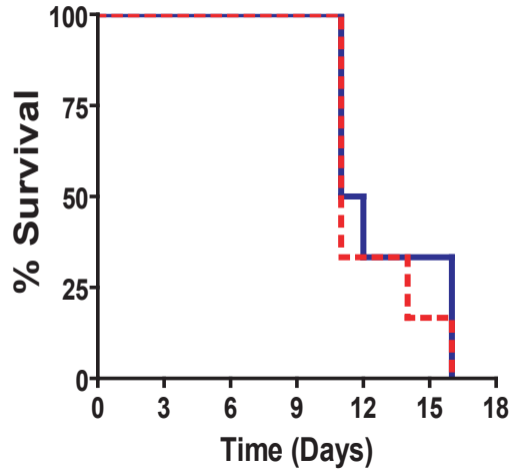

Supplement: pnas_0510254103_4.pdf [file pnas_0510254103_4.pdf]

**A**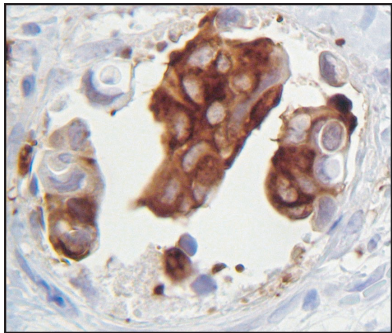**B**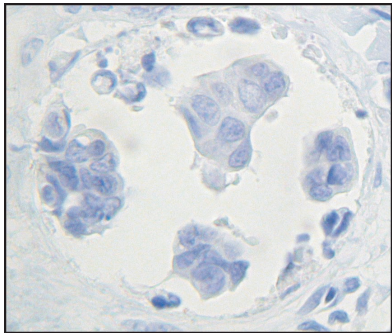

Supplement: pnas_0510254103_5.pdf [file pnas_0510254103_5.pdf]

**A**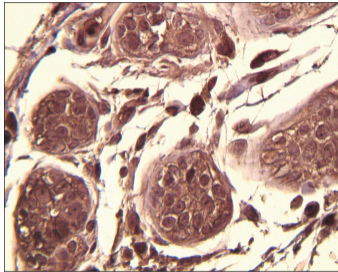**B**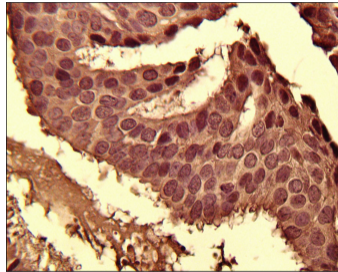**C**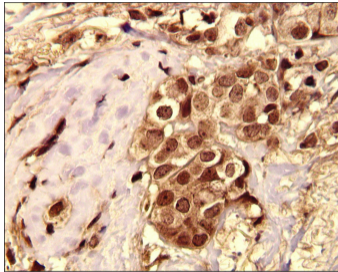

Supplement: pnas_0510254103_6.pdf [file pnas_0510254103_6.pdf]
